# Supplementary material for: The Pedagogy of Cyberethics in Health Professions Education: A Scoping Review
Source: Preprints.org preprint supplement (doi:10.20944/preprints202309.0557.v1), 2023-09-08
Supplement: Supplementary file 2 [file supplementary]

**Figure S1.** PRISMA-ScR (Preferred Reporting Items for Systematic Reviews and Meta-Analyses extension for Scoping Reviews) flow chart for the article search

(a) English article search flow chart

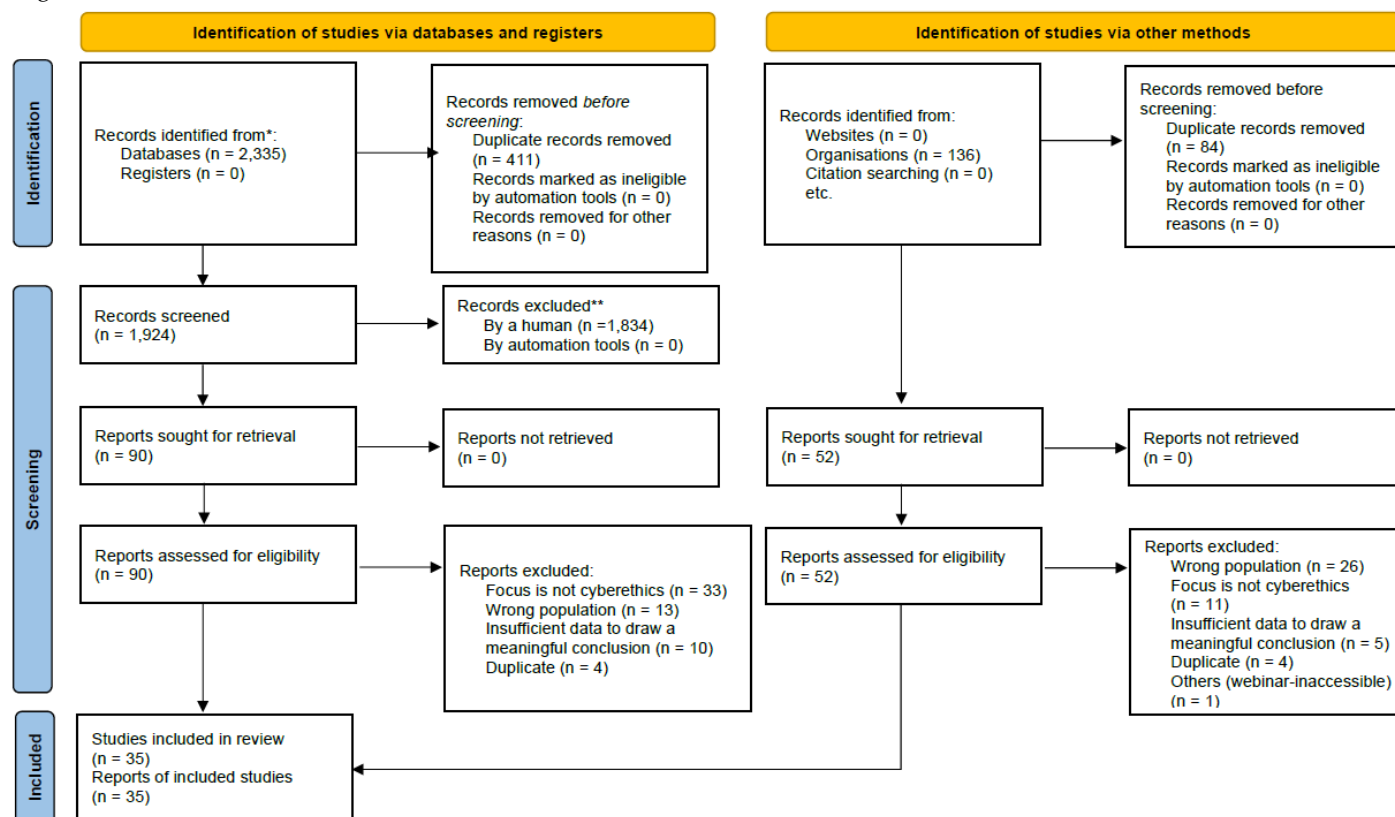

(b) Korean article search flow chart

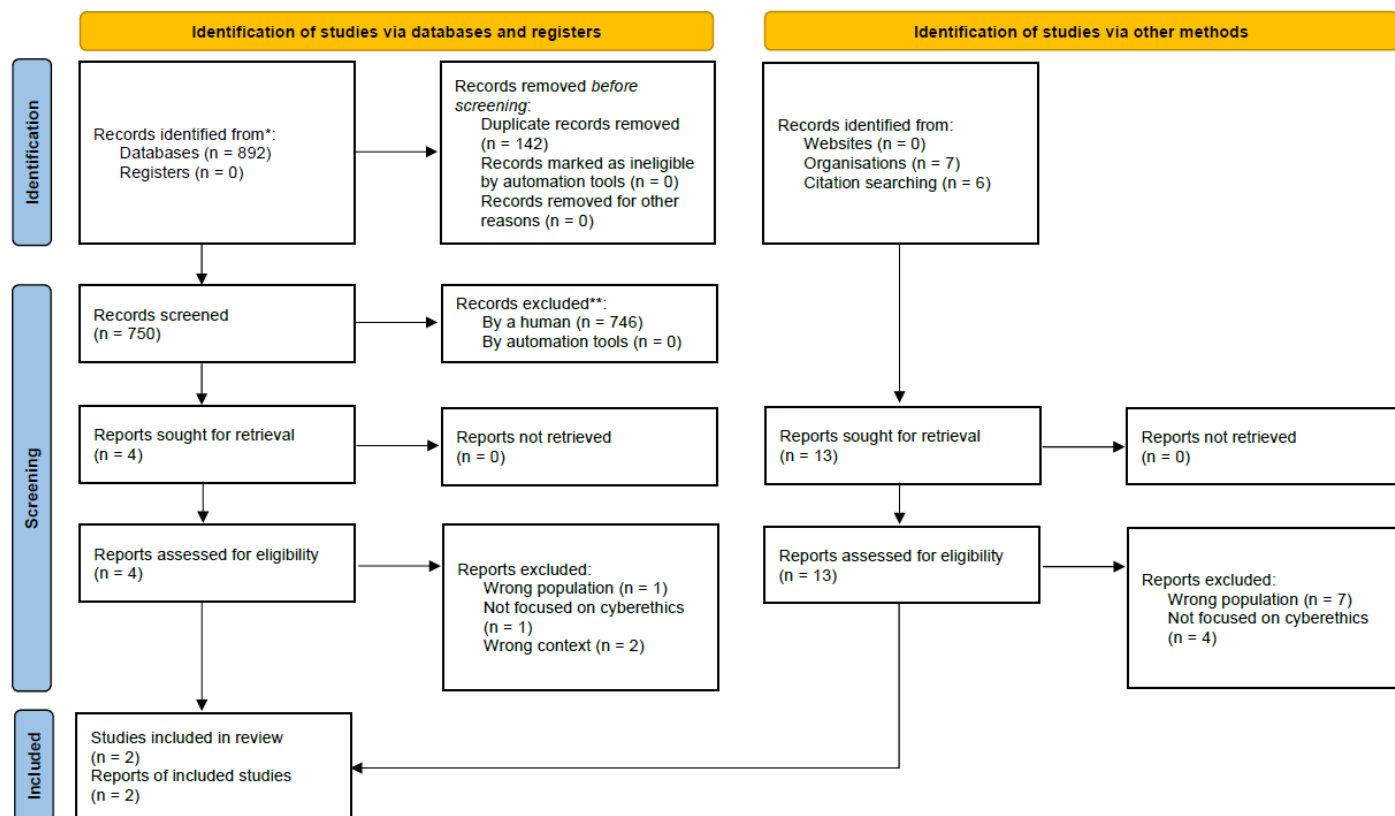

\*Consider, if feasible to do so, reporting the number of records identified from each database or register searched (rather than the total number across all databases/registers).

\*\*If automation tools were used, indicate how many records were excluded by a human and how many were excluded by automation tools.

From: Page MJ, McKenzie JE, Bossuyt PM, Boutron I, Hoffmann TC, Mulrow CD, et al. The PRISMA 2020 statement: an updated guideline for reporting systematic reviews. *BMJ* 2021;372:n71. doi: 10.1136/bmj.n71. For more information, visit: <http://www.prisma-statement.org/>
