# Supplementary material for: The Pedagogy of Cyberethics in Health Professions Education: A Scoping Review
Source: Preprints.org preprint supplement (doi:10.20944/preprints202309.0557.v1), 2023-09-08
Supplement: Supplementary file 4 [file supplementary]

## Appendix A: Search Strategies

**Databases: Medline (via Ovid), CINAHL (via Ebscohost), PsycInfo (via Ebscohost), Sociology Source Ultimate (via Ebscohost), Sociology Source Ultimate (via Ebscohost), Proquest Dissertations & Theses Global**

Date: 01/25/23

Searcher: Leila Ledbetter, MLIS, AHIP, Duke University Medical Center Library and Archives

### Database: Medline (via Ovid)

| Search                                        | Query                                                                                                                                                                                                                                                                                                                                                                                                                                                                                                                                                                                                                                                                                                                                   | Records retrieved |
|-----------------------------------------------|-----------------------------------------------------------------------------------------------------------------------------------------------------------------------------------------------------------------------------------------------------------------------------------------------------------------------------------------------------------------------------------------------------------------------------------------------------------------------------------------------------------------------------------------------------------------------------------------------------------------------------------------------------------------------------------------------------------------------------------------|-------------------|
| 1<br>Health Professions<br>Students/education | "Education, Professional"/ or exp "Education, Medical"/ or exp "Education, Nursing"/ or "Education, Graduate"/ or exp "Education, Dental"/ or exp "Education, Pharmacy"/ or exp "Education, Public Health Professional"/ or "Schools, Health Occupations"/ or exp "Schools, Medical"/ or exp "Schools, pharmacy"/ or exp "Schools, Dental"/ or exp "Schools, public health"/ or exp "Students, Health Occupations"/ or exp "Faculty, Nursing"/ or exp "Faculty, Medical"/ or exp "Faculty, Dental"/ or exp "Faculty, Nursing"/ or exp "Faculty, pharmacy"/ or exp "Schools, Nursing"/ or exp "Students, Public Health"/ or exp "Students, Pharmacy"/ or exp "Students, Medical"/ or exp "Students, Nursing"/ or exp "Students, Dental"/ | 371,380           |
| 2<br>Health professions                       | (Nursing or nurse or nurses or medical or dental or pharmacy or "physical therapy" or "occupational therapy" or "public health" or "allied health" or chiropractic or midwifery or podiatry or "physician assistant" or "health professions" or "health occupations").ti,ab.                                                                                                                                                                                                                                                                                                                                                                                                                                                            | 2,390,490         |
| 3<br>education                                | exp "Education, Distance"/ or education.fs. or exp Learning/ or exp Teaching/ or exp Students/                                                                                                                                                                                                                                                                                                                                                                                                                                                                                                                                                                                                                                          | 865,679           |
| 4<br>Health professions<br>education          | 2 and 3                                                                                                                                                                                                                                                                                                                                                                                                                                                                                                                                                                                                                                                                                                                                 | 194,788           |
| 5<br>education                                | (education OR Educating OR educated OR educates OR educational OR learn OR learning OR learned OR learns OR teach OR teaching OR taught OR teaches OR school OR schools OR schooling OR student OR students OR class OR classes OR curriculum OR course OR courses OR classroom OR classrooms OR faculty OR university OR universities or college Or colleges OR pedagogy OR pedagogies or instructor or instructors).ti,ab.                                                                                                                                                                                                                                                                                                            | 3,181,041         |
| 6<br>Health professions<br>education          | 2 AND 5                                                                                                                                                                                                                                                                                                                                                                                                                                                                                                                                                                                                                                                                                                                                 | 668,979           |
| 7                                             | 1 or 4 or 6                                                                                                                                                                                                                                                                                                                                                                                                                                                                                                                                                                                                                                                                                                                             | 895,438           |
| 8<br>cyber                                    | Exp "Internet Use"/ or exp "Social Media"/                                                                                                                                                                                                                                                                                                                                                                                                                                                                                                                                                                                                                                                                                              | 15,311            |
| 9<br>cyber                                    | (cyber* or internet or online or web or digital).ti,ab.                                                                                                                                                                                                                                                                                                                                                                                                                                                                                                                                                                                                                                                                                 | 561,514           |
| 10<br>ethics                                  | Exp "Morals"/                                                                                                                                                                                                                                                                                                                                                                                                                                                                                                                                                                                                                                                                                                                           | 181,318           |
| 11<br>ethics                                  | (Moral* or ethic* or integrity or cyberethics or cybermorality or immoral* or impropriety or unethical* or norms OR mores).ti,ab.                                                                                                                                                                                                                                                                                                                                                                                                                                                                                                                                                                                                       | 375,957           |
| 12<br>morality                                | 8 and 10                                                                                                                                                                                                                                                                                                                                                                                                                                                                                                                                                                                                                                                                                                                                | 492               |
| 13                                            | 9 adj5 11                                                                                                                                                                                                                                                                                                                                                                                                                                                                                                                                                                                                                                                                                                                               | 1,140             |
| 14                                            | 12 or 13                                                                                                                                                                                                                                                                                                                                                                                                                                                                                                                                                                                                                                                                                                                                | 1,608             |
| 15                                            | 7 and 14                                                                                                                                                                                                                                                                                                                                                                                                                                                                                                                                                                                                                                                                                                                                | 296               |
| 16                                            | limit 15 to yr="1990 -Current"                                                                                                                                                                                                                                                                                                                                                                                                                                                                                                                                                                                                                                                                                                          | 296               |

### Database: CINAHL (via Ebscohost)

| Search                                        | Query                                                                                                                                                                                                                                                                                                                          | Records retrieved |
|-----------------------------------------------|--------------------------------------------------------------------------------------------------------------------------------------------------------------------------------------------------------------------------------------------------------------------------------------------------------------------------------|-------------------|
| 1<br>Health Professions<br>Students/education | (MH "Education, Medical+") OR (MH "Education, Nursing+") OR (MH "Education, Graduate+") OR (MH "Education, Dental") OR (MH "Education, Pharmacy") OR (MH "Schools, Health Occupations+") OR (MH "Schools, Medical") OR (MH "Schools, Allied Health") OR (MH "Students, Health Occupations+") OR (MH "Faculty, Nursing") OR (MH | 219,969           |

|                                      |                                                                                                                                                                                                                                                                                                                                                                                                                                                                                                                                                                                                                                                                                                                                                                                                                                                      |           |
|--------------------------------------|------------------------------------------------------------------------------------------------------------------------------------------------------------------------------------------------------------------------------------------------------------------------------------------------------------------------------------------------------------------------------------------------------------------------------------------------------------------------------------------------------------------------------------------------------------------------------------------------------------------------------------------------------------------------------------------------------------------------------------------------------------------------------------------------------------------------------------------------------|-----------|
|                                      | "Faculty, Medical") OR (MH "Faculty, Dental") OR (MH "Schools, Nursing") OR (MH "Students, Pharmacy") OR (MH "Students, Medical") OR (MH "Students, Nursing+") OR (MH "Students, Dental")                                                                                                                                                                                                                                                                                                                                                                                                                                                                                                                                                                                                                                                            |           |
| 2<br>Health professions              | TI (Nursing OR nurse OR nurses OR medical OR dental OR pharmacy OR "physical therapy" OR "occupational therapy" OR "public health" OR "allied health" OR chiropractic OR midwifery OR podiatry OR "physician assistant" OR "health professions" OR "health occupations") OR AB (Nursing OR nurse OR nurses OR medical OR dental OR pharmacy OR "physical therapy" OR "occupational therapy" OR "public health" OR "allied health" OR chiropractic OR midwifery OR podiatry OR "physician assistant" OR "health professions" OR "health occupations")                                                                                                                                                                                                                                                                                                 | 1,281,983 |
| 3<br>education                       | (MH "Online Education") OR (MH "Learning+") OR (MH "Teaching+") OR (MH "Students+")                                                                                                                                                                                                                                                                                                                                                                                                                                                                                                                                                                                                                                                                                                                                                                  | 491,847   |
| 4<br>Health professions<br>education | S2 and S3                                                                                                                                                                                                                                                                                                                                                                                                                                                                                                                                                                                                                                                                                                                                                                                                                                            | 135,542   |
| 5<br>education                       | TI (education OR Educating OR educated OR educates OR educational OR learn OR learning OR learned OR learns OR teach OR teaching OR taught OR teaches OR school OR schools OR schooling OR student OR students OR class OR classes OR curriculum OR course OR courses OR classroom OR classrooms OR faculty OR university OR universities OR college OR colleges OR pedagogy OR pedagogies OR instructor OR instructors) OR AB (education OR Educating OR educated OR educates OR educational OR learn OR learning OR learned OR learns OR teach OR teaching OR taught OR teaches OR school OR schools OR schooling OR student OR students OR class OR classes OR curriculum OR course OR courses OR classroom OR classrooms OR faculty OR university OR universities OR college OR colleges OR pedagogy OR pedagogies OR instructor OR instructors) | 1,127,612 |
| 6<br>Health professions<br>education | S2 AND S5                                                                                                                                                                                                                                                                                                                                                                                                                                                                                                                                                                                                                                                                                                                                                                                                                                            | 376,609   |
| 7                                    | S1 or S4 or S6                                                                                                                                                                                                                                                                                                                                                                                                                                                                                                                                                                                                                                                                                                                                                                                                                                       | 518,509   |
| 8<br>cyber                           | (MH "Social Media+") OR (MH "Internet+")                                                                                                                                                                                                                                                                                                                                                                                                                                                                                                                                                                                                                                                                                                                                                                                                             | 67,844    |
| 9<br>cyber                           | TI (cyber* OR internet OR online OR web OR digital) OR AB (cyber* OR internet OR online OR web OR digital)                                                                                                                                                                                                                                                                                                                                                                                                                                                                                                                                                                                                                                                                                                                                           | 233,066   |
| 10<br>ethics                         | MH "Morals+"                                                                                                                                                                                                                                                                                                                                                                                                                                                                                                                                                                                                                                                                                                                                                                                                                                         | 42,830    |
| 11<br>ethics                         | TI (Moral* OR ethic* OR integrity OR cyberethics OR cybermorality OR immoral* OR impropriety OR unethic* OR norms OR mores) OR AB (Moral* OR ethic* OR integrity OR cyberethics OR cybermorality OR immoral* OR impropriety OR unethic* OR norms OR mores)                                                                                                                                                                                                                                                                                                                                                                                                                                                                                                                                                                                           | 1,124,002 |
| 12<br>morality                       | S8 and S10                                                                                                                                                                                                                                                                                                                                                                                                                                                                                                                                                                                                                                                                                                                                                                                                                                           | 1,119     |
| 13                                   | S9 N5 S11                                                                                                                                                                                                                                                                                                                                                                                                                                                                                                                                                                                                                                                                                                                                                                                                                                            | 5,734     |
| 14                                   | S12 or S13                                                                                                                                                                                                                                                                                                                                                                                                                                                                                                                                                                                                                                                                                                                                                                                                                                           | 6,808     |
| 15                                   | S7 and S14                                                                                                                                                                                                                                                                                                                                                                                                                                                                                                                                                                                                                                                                                                                                                                                                                                           | 964       |
| 16                                   | Unable to limit to 1990 because the oldest citation available in the search is 1993                                                                                                                                                                                                                                                                                                                                                                                                                                                                                                                                                                                                                                                                                                                                                                  | 964       |

#### Database: PsycInfo (via Ebscohost)

| Search                                        | Query                                                                                                                                                                                                                                                                                                                                                                                                                                                                                                                                                | Records retrieved |
|-----------------------------------------------|------------------------------------------------------------------------------------------------------------------------------------------------------------------------------------------------------------------------------------------------------------------------------------------------------------------------------------------------------------------------------------------------------------------------------------------------------------------------------------------------------------------------------------------------------|-------------------|
| 1<br>Health Professions<br>Students/education | DE "Medical Education" OR DE "Medical Internship" OR DE "Medical Residency" OR DE "Psychiatric Training" OR DE "Graduate Education" OR DE "Dental Education" OR DE "Nursing Education" OR DE "Nursing Students" OR DE "Medical Students" OR DE "Dental Students"                                                                                                                                                                                                                                                                                     | 46,598            |
| 2<br>Health professions                       | TI (Nursing OR nurse OR nurses OR medical OR dental OR pharmacy OR "physical therapy" OR "occupational therapy" OR "public health" OR "allied health" OR chiropractic OR midwifery OR podiatry OR "physician assistant" OR "health professions" OR "health occupations") OR AB (Nursing OR nurse OR nurses OR medical OR dental OR pharmacy OR "physical therapy" OR "occupational therapy" OR "public health" OR "allied health" OR chiropractic OR midwifery OR podiatry OR "physician assistant" OR "health professions" OR "health occupations") | 376,486           |

|                                      |                                                                                                                                                                                                                                                                                                                                                                                                                                                                                                                                                                                                                                                                                                                                                                                                                                                      |           |
|--------------------------------------|------------------------------------------------------------------------------------------------------------------------------------------------------------------------------------------------------------------------------------------------------------------------------------------------------------------------------------------------------------------------------------------------------------------------------------------------------------------------------------------------------------------------------------------------------------------------------------------------------------------------------------------------------------------------------------------------------------------------------------------------------------------------------------------------------------------------------------------------------|-----------|
| 3<br>education                       | DE "Distance Education" OR DE "Electronic Learning" OR DE "Learning" OR DE "Teaching" OR DE "Students"                                                                                                                                                                                                                                                                                                                                                                                                                                                                                                                                                                                                                                                                                                                                               | 201,738   |
| 4<br>Health professions<br>education | S2 and S3                                                                                                                                                                                                                                                                                                                                                                                                                                                                                                                                                                                                                                                                                                                                                                                                                                            | 11,180    |
| 5<br>education                       | TI (education OR Educating OR educated OR educates OR educational OR learn OR learning OR learned OR learns OR teach OR teaching OR taught OR teaches OR school OR schools OR schooling OR student OR students OR class OR classes OR curriculum OR course OR courses OR classroom OR classrooms OR faculty OR university OR universities OR college OR colleges OR pedagogy OR pedagogies OR instructor OR instructors) OR AB (education OR Educating OR educated OR educates OR educational OR learn OR learning OR learned OR learns OR teach OR teaching OR taught OR teaches OR school OR schools OR schooling OR student OR students OR class OR classes OR curriculum OR course OR courses OR classroom OR classrooms OR faculty OR university OR universities OR college OR colleges OR pedagogy OR pedagogies OR instructor OR instructors) | 1,674,462 |
| 6<br>Health professions<br>education | S2 AND S5                                                                                                                                                                                                                                                                                                                                                                                                                                                                                                                                                                                                                                                                                                                                                                                                                                            | 142,295   |
| 7                                    | S1 or S4 or S6                                                                                                                                                                                                                                                                                                                                                                                                                                                                                                                                                                                                                                                                                                                                                                                                                                       | 156,149   |
| 8<br>cyber                           | DE "Social Media" OR DE "Internet Usage"                                                                                                                                                                                                                                                                                                                                                                                                                                                                                                                                                                                                                                                                                                                                                                                                             | 17,751    |
| 9<br>cyber                           | TI (cyber* OR internet OR online OR web OR digital) OR AB (cyber* OR internet OR online OR web OR digital)                                                                                                                                                                                                                                                                                                                                                                                                                                                                                                                                                                                                                                                                                                                                           | 203,018   |
| 10<br>ethics                         | DE "Morality"                                                                                                                                                                                                                                                                                                                                                                                                                                                                                                                                                                                                                                                                                                                                                                                                                                        | 26,513    |
| 11<br>ethics                         | TI (Moral* OR ethic* OR integrity OR cyberethics OR cybermorality OR immoral* OR impropriety OR unethic* OR norms OR mores) OR AB (Moral* OR ethic* OR integrity OR cyberethics OR cybermorality OR immoral* OR impropriety OR unethic* OR norms OR mores)                                                                                                                                                                                                                                                                                                                                                                                                                                                                                                                                                                                           | 1,510,279 |
| 12<br>morality                       | S8 and S10                                                                                                                                                                                                                                                                                                                                                                                                                                                                                                                                                                                                                                                                                                                                                                                                                                           | 107       |
| 13                                   | S9 N5 S11                                                                                                                                                                                                                                                                                                                                                                                                                                                                                                                                                                                                                                                                                                                                                                                                                                            | 10,335    |
| 14                                   | S12 or S13                                                                                                                                                                                                                                                                                                                                                                                                                                                                                                                                                                                                                                                                                                                                                                                                                                           | 10,416    |
| 15                                   | S7 and S14                                                                                                                                                                                                                                                                                                                                                                                                                                                                                                                                                                                                                                                                                                                                                                                                                                           | 430       |
| 16                                   | Unable to limit to 1990 because the oldest citation available in the search is 1999                                                                                                                                                                                                                                                                                                                                                                                                                                                                                                                                                                                                                                                                                                                                                                  | 430       |

**Database: Sociology Source Ultimate (via Ebscohost)**

| Search                                        | Query                                                                                                                                                                                                                                                                                                                                                                                                                                                                                                                                                                                                  | Records<br>retrieved |
|-----------------------------------------------|--------------------------------------------------------------------------------------------------------------------------------------------------------------------------------------------------------------------------------------------------------------------------------------------------------------------------------------------------------------------------------------------------------------------------------------------------------------------------------------------------------------------------------------------------------------------------------------------------------|----------------------|
| 1<br>Health Professions<br>Students/education | DE "PROFESSIONAL education" OR DE "GRADUATE students" OR DE "UNIVERSITIES & colleges"                                                                                                                                                                                                                                                                                                                                                                                                                                                                                                                  | 30,457               |
| 2<br>Health professions                       | TI (Nursing OR nurse OR nurses OR medical OR dental OR pharmacy OR "physical therapy" OR "occupational therapy" OR "public health" OR "allied health" OR chiropractic OR midwifery OR podiatry OR "physician assistant" OR "health professions" OR "health occupations") OR AB (Nursing OR nurse OR nurses OR medical OR dental OR pharmacy OR "physical therapy" OR "occupational therapy" OR "public health" OR "allied health" OR chiropractic OR midwifery OR podiatry OR "physician assistant" OR "health professions" OR "health occupations")                                                   | 124,295              |
| 3<br>education                                | DE "DISTANCE education" OR DE "ONLINE education" or DE "EDUCATION" OR DE "LEARNING" OR DE "TEACHING" OR DE "STUDENTS"                                                                                                                                                                                                                                                                                                                                                                                                                                                                                  | 98,355               |
| 4<br>Health professions<br>education          | S2 AND S3                                                                                                                                                                                                                                                                                                                                                                                                                                                                                                                                                                                              | 2,456                |
| 5<br>education                                | TI (education OR Educating OR educated OR educates OR educational OR learn OR learning OR learned OR learns OR teach OR teaching OR taught OR teaches OR school OR schools OR schooling OR student OR students OR class OR classes OR curriculum OR course OR courses OR classroom OR classrooms OR faculty OR university OR universities OR college OR colleges OR pedagogy OR pedagogies OR instructor OR instructors) OR AB (education OR Educating OR educated OR educates OR educational OR learn OR learning OR learned OR learns OR teach OR teaching OR taught OR teaches OR school OR schools | 694,128              |

|                                      |                                                                                                                                                                                                                                                            |         |
|--------------------------------------|------------------------------------------------------------------------------------------------------------------------------------------------------------------------------------------------------------------------------------------------------------|---------|
|                                      | OR schooling OR student OR students OR class OR classes OR curriculum OR course OR courses OR classroom OR classrooms OR faculty OR university OR universities OR college OR colleges OR pedagogy OR pedagogies OR instructor OR instructors)              |         |
| 6<br>Health professions<br>education | S2 AND S5                                                                                                                                                                                                                                                  | 35,589  |
| 7                                    | S1 OR S4 OR S6                                                                                                                                                                                                                                             | 65,131  |
| 8<br>cyber                           | DE "INTERNET users" OR DE "INTERNET" OR DE "SOCIAL media"                                                                                                                                                                                                  | 14,798  |
| 9<br>cyber                           | TI (cyber* OR internet OR online OR web OR digital) OR AB (cyber* OR internet OR online OR web OR digital)                                                                                                                                                 | 61,907  |
| 10<br>ethics                         | DE "MORAL attitudes" OR DE "ETHICS"                                                                                                                                                                                                                        | 17,647  |
| 11<br>ethics                         | TI (Moral* OR ethic* OR integrity OR cyberethics OR cybermorality OR immoral* OR impropriety OR unethic* OR norms OR mores) OR AB (Moral* OR ethic* OR integrity OR cyberethics OR cybermorality OR immoral* OR impropriety OR unethic* OR norms OR mores) | 528,068 |
| 12<br>morality                       | S8 and S10                                                                                                                                                                                                                                                 | 202     |
| 13                                   | S9 N5 S11                                                                                                                                                                                                                                                  | 2,866   |
| 14                                   | S12 or S13                                                                                                                                                                                                                                                 | 3,023   |
| 15                                   | S7 and S14                                                                                                                                                                                                                                                 | 78      |
| 16                                   | Limiters - Published Date: 19900101-20221231                                                                                                                                                                                                               | 77      |

**Database: Education Full Text (via Ebscohost)**

| Search                                        | Query                                                                                                                                                                                                                                                                                                                                                                                                                                                                                                                                                                                                                                                                                                                                                                                                                                                | Records<br>retrieved |
|-----------------------------------------------|------------------------------------------------------------------------------------------------------------------------------------------------------------------------------------------------------------------------------------------------------------------------------------------------------------------------------------------------------------------------------------------------------------------------------------------------------------------------------------------------------------------------------------------------------------------------------------------------------------------------------------------------------------------------------------------------------------------------------------------------------------------------------------------------------------------------------------------------------|----------------------|
| 1<br>Health Professions<br>Students/education | DE "Professional education" OR DE "Medical education" OR DE "Nursing education" OR DE "Graduate nursing education" OR DE "Public health nursing education" OR DE "Graduate education" OR DE "Graduate nursing education" OR DE "Pharmacy education" OR DE "Public health education" OR DE "Public health education (Graduate)" OR DE "Public health education (Higher)" OR DE "Health occupations schools" OR DE "Medical school faculty" OR DE "Dental education" OR DE "Dental health education" OR DE "Dental faculty" OR DE "Nursing school faculty" OR DE "Nursing schools" OR DE "Pharmacy students" OR DE "Medical students" OR DE "Chiropractic students" OR DE "Medical school applicants" OR DE "Podiatry students" OR DE "Women medical students" OR DE "Nursing students" OR DE "Dental students"                                        | 66,266               |
| 2<br>Health professions                       | TI (Nursing OR nurse OR nurses OR medical OR dental OR pharmacy OR "physical therapy" OR "occupational therapy" OR "public health" OR "allied health" OR chiropractic OR midwifery OR podiatry OR "physician assistant" OR "health professions" OR "health occupations") OR AB (Nursing OR nurse OR nurses OR medical OR dental OR pharmacy OR "physical therapy" OR "occupational therapy" OR "public health" OR "allied health" OR chiropractic OR midwifery OR podiatry OR "physician assistant" OR "health professions" OR "health occupations")                                                                                                                                                                                                                                                                                                 | 134,483              |
| 3<br>education                                | DE "Distance education" OR DE "Education" OR DE "Learning" OR DE "Active learning" OR DE "Teaching" OR DE "Students" DE "Distance education students" OR DE "Dutch students" OR DE "Education students"                                                                                                                                                                                                                                                                                                                                                                                                                                                                                                                                                                                                                                              | 262,211              |
| 4<br>Health professions<br>education          | S2 AND S3                                                                                                                                                                                                                                                                                                                                                                                                                                                                                                                                                                                                                                                                                                                                                                                                                                            | 10,295               |
| 5<br>education                                | TI (education OR Educating OR educated OR educates OR educational OR learn OR learning OR learned OR learns OR teach OR teaching OR taught OR teaches OR school OR schools OR schooling OR student OR students OR class OR classes OR curriculum OR course OR courses OR classroom OR classrooms OR faculty OR university OR universities OR college OR colleges OR pedagogy OR pedagogies OR instructor OR instructors) OR AB (education OR Educating OR educated OR educates OR educational OR learn OR learning OR learned OR learns OR teach OR teaching OR taught OR teaches OR school OR schools OR schooling OR student OR students OR class OR classes OR curriculum OR course OR courses OR classroom OR classrooms OR faculty OR university OR universities OR college OR colleges OR pedagogy OR pedagogies OR instructor OR instructors) | 1,967,029            |

|                                      |                                                                                                                                                                                                                                                            |         |
|--------------------------------------|------------------------------------------------------------------------------------------------------------------------------------------------------------------------------------------------------------------------------------------------------------|---------|
| 6<br>Health professions<br>education | S2 AND S5                                                                                                                                                                                                                                                  | 82,792  |
| 7                                    | S1 OR S4 OR S6                                                                                                                                                                                                                                             | 112,667 |
| 8<br>cyber                           | DE "Internet users" OR DE "Social media" OR DE "Online chat" OR                                                                                                                                                                                            | 16,196  |
| 9<br>cyber                           | TI (cyber* OR internet OR online OR web OR digital) OR AB (cyber* OR internet OR online OR web OR digital)                                                                                                                                                 | 265,070 |
| 10<br>ethics                         | DE "Ethical problems"                                                                                                                                                                                                                                      | 572     |
| 11<br>ethics                         | TI (Moral* OR ethic* OR integrity OR cyberethics OR cybermorality OR immoral* OR impropriety OR unethic* OR norms OR mores) OR AB (Moral* OR ethic* OR integrity OR cyberethics OR cybermorality OR immoral* OR impropriety OR unethic* OR norms OR mores) | 127,728 |
| 12<br>morality                       | S8 and S10                                                                                                                                                                                                                                                 | 6       |
| 13                                   | S9 N5 S11                                                                                                                                                                                                                                                  | 1,892   |
| 14                                   | S12 OR S13                                                                                                                                                                                                                                                 | 1,897   |
| 15                                   | S7 AND S14                                                                                                                                                                                                                                                 | 84      |
| 16                                   | Unable to limit to 1990 because the oldest citation available in the search is 1997                                                                                                                                                                        | 84      |

#### Database: Proquest Dissertations & Theses Global

| Search                  | Query                                                                                                                                                                                                                                                                                                                                                                                                                     | Records<br>retrieved |
|-------------------------|---------------------------------------------------------------------------------------------------------------------------------------------------------------------------------------------------------------------------------------------------------------------------------------------------------------------------------------------------------------------------------------------------------------------------|----------------------|
| 1<br>Health professions | NOFT(Nursing OR nurse OR nurses OR medical OR dental OR pharmacy OR "physical therapy" OR "occupational therapy" OR "public health" OR "allied health" OR chiropractic OR midwifery OR podiatry OR "physician assistant" OR "health professions" OR "health occupations")                                                                                                                                                 | 337,093              |
| 2<br>education          | NOFT(education OR Educating OR educated OR educates OR educational OR learn OR learning OR learned OR learns OR teach OR teaching OR taught OR teaches OR school OR schools OR schooling OR student OR students OR class OR classes OR curriculum OR course OR courses OR classroom OR classrooms OR faculty OR university OR universities OR college OR colleges OR pedagogy OR pedagogies OR instructor OR instructors) | 4,964,986            |
| 3<br>cyberethics        | NOFT((cyber* OR internet OR online OR web OR digital) NEAR/5 (Moral* OR ethic* OR integrity OR cyberethics OR cybermorality OR immoral* OR impropriety OR unethic* OR norms OR mores))                                                                                                                                                                                                                                    | 11,794               |
| 4                       | 1 AND 2 AND 3                                                                                                                                                                                                                                                                                                                                                                                                             | 486                  |
| 5                       | Applied filters: 1990-2029                                                                                                                                                                                                                                                                                                                                                                                                | 484                  |

#### Databases (Korean): RISS, KISS, DBpia, ScienceON

Date: 02/15/2023

Searcher: L. Yoo through the Ewha Womans University Library

| KISS (via EWHA Library) <a href="https://kiss.kstudy.com/">https://kiss.kstudy.com/</a> |                                                                                                                                                                                                                               |         |
|-----------------------------------------------------------------------------------------|-------------------------------------------------------------------------------------------------------------------------------------------------------------------------------------------------------------------------------|---------|
| Set #                                                                                   | Search Strategy                                                                                                                                                                                                               | Results |
| 1.<br>Participants                                                                      | [논문명] "간호" "의료" "의대" "의과대" "물리 치료" "작업 치료" "언어 치료" "치대" "치과" "영양학" "식품 영양학" "약대" "약학" "보건" "보건 의료" "의료 보건"<br>OR<br>[초록] "간호" "의료" "의대" "의과대" "물리 치료" "작업 치료" "언어 치료" "치대" "치과" "영양학" "식품 영양학" "약대" "약학" "보건" "보건 의료" "의료 보건" | 2,703   |
| 2.<br>Concept                                                                           | 2-1.<br>[논문명] "온라인" "디지털" "사이버" "인터넷" "정보" "정보 통신" "통신" "소셜 미디어" "SNS"<br>OR<br>[초록] "온라인" "디지털" "사이버" "인터넷" "정보" "정보 통신" "통신" "소셜 미디어" "SNS"                                                                                 | 4,798   |
|                                                                                         | 2-2.<br>[논문명] "윤리" "에티켓" "시민성" "비시민성" "프로페셔널리즘" "전문직업성" "전문직 윤리" "가이드라인" "지침"                                                                                                                                                 | 24,237  |

|                     |                                                                                                                                                                                                                                                                                                                             |     |
|---------------------|-----------------------------------------------------------------------------------------------------------------------------------------------------------------------------------------------------------------------------------------------------------------------------------------------------------------------------|-----|
|                     | <b>OR</b><br>[초록] “윤리” “에티켓” “시민성” “비시민성” “프로페셔널리즘” “전문직업성” “전문직 윤리” “가이드라인” “지침”<br>(#2-1 논문명 AND #2-2 논문명) OR (#2-1 초록 AND #2-2 초록)                                                                                                                                                                                       | 165 |
| 3. Combine          | (#1 논문명 AND #2 논문명) OR (#1 초록 AND #2 초록)                                                                                                                                                                                                                                                                                    | 6   |
| 4. NOT              | "청소년" "초등" "중등" "중학" "고등" "십대" "10 대"<br>("간호" "의료" "의대" "의과대" "물리 치료" "작업 치료" "언어 치료" "치대" "치과" "영양학" "식품 영양학" "약대" "약학" "보건" "보건 의료" "의료 보건")<br>("온라인" "디지털" "사이버" "인터넷" "정보" "정보 통신" "통신" "소셜 미디어" "SNS")<br>("윤리" "에티켓" "시민성" "비시민성" "프로페셔널리즘" "전문직업성" "전문직 윤리" "가이드라인" "지침") !("청소년" "초등" "중등" "중학" "고등" "십대" "10 대") | 3   |
| 5. Publication Year | 1990 년 이전 제외                                                                                                                                                                                                                                                                                                                | 3   |

| DBpia (via EWHA Library) <a href="https://kiss.kstudy.com/">https://kiss.kstudy.com/</a> |                                                                                                                                                                                                                                                                                                                             |         |
|------------------------------------------------------------------------------------------|-----------------------------------------------------------------------------------------------------------------------------------------------------------------------------------------------------------------------------------------------------------------------------------------------------------------------------|---------|
| Set #                                                                                    | Search Strategy                                                                                                                                                                                                                                                                                                             | Results |
| 1. Participants                                                                          | [전체] "간호" "의료" "의대" "의과대" "물리 치료" "작업 치료" "언어 치료" "치대" "치과" "영양학" "식품 영양학" "약대" "약학" "보건" "보건 의료" "의료 보건"                                                                                                                                                                                                                   | 185,077 |
| 2. Concept                                                                               | 2-1.<br>[전체] "온라인" "디지털" "사이버" "인터넷" "정보" "정보 통신" "통신" "소셜 미디어" "SNS"                                                                                                                                                                                                                                                       | 185,077 |
|                                                                                          | 2-2.<br>[전체] "윤리" "에티켓" "시민성" "비시민성" "프로페셔널리즘" "전문직업성" "전문직 윤리" "가이드라인" "지침"                                                                                                                                                                                                                                                | 81,935  |
|                                                                                          | (#2-1 AND #2-2)                                                                                                                                                                                                                                                                                                             | 15,436  |
| 3. Combine                                                                               | (#1 AND #2)                                                                                                                                                                                                                                                                                                                 | 474     |
| 4. NOT                                                                                   | "청소년" "초등" "중등" "중학" "고등" "십대" "10 대"<br>("간호" "의료" "의대" "의과대" "물리 치료" "작업 치료" "언어 치료" "치대" "치과" "영양학" "식품 영양학" "약대" "약학" "보건" "보건 의료" "의료 보건")<br>("온라인" "디지털" "사이버" "인터넷" "정보" "정보 통신" "통신" "소셜 미디어" "SNS")<br>("윤리" "에티켓" "시민성" "비시민성" "프로페셔널리즘" "전문직업성" "전문직 윤리" "가이드라인" "지침") !("청소년" "초등" "중등" "중학" "고등" "십대" "10 대") | 440     |
| 5. Publication Year                                                                      | 1990 년 이전 제외                                                                                                                                                                                                                                                                                                                | 440     |

| RISS (via EWHA Library) |                                                                                                                                                                                                                                      |         |
|-------------------------|--------------------------------------------------------------------------------------------------------------------------------------------------------------------------------------------------------------------------------------|---------|
| Set #                   | Search Strategy                                                                                                                                                                                                                      | Results |
| 1. Participants         | [논문명] "간호" "의료" "의대" "의과대" "물리 치료" "작업 치료" "언어 치료" "치대" "치과" "영양학" "식품 영양학" "약대" "약학" "보건" "보건 의료" "의료 보건"<br><b>OR</b><br>[초록] "간호" "의료" "의대" "의과대" "물리 치료" "작업 치료" "언어 치료" "치대" "치과" "영양학" "식품 영양학" "약대" "약학" "보건" "보건 의료" "의료 보건" | 89,944  |
| 2. Concept              | 2-1.<br>[논문명] "온라인" "디지털" "사이버" "인터넷" "정보" "정보 통신" "통신" "소셜 미디어" "SNS"<br><b>OR</b><br>[초록] "온라인" "디지털" "사이버" "인터넷" "정보" "정보 통신" "통신" "소셜 미디어" "SNS"                                                                                 | 357,538 |
|                         | 2-2.<br>[논문명] "윤리" "에티켓" "시민성" "비시민성" "프로페셔널리즘" "전문직업성" "전문직 윤리" "가이드라인" "지침"<br><b>OR</b>                                                                                                                                           | 58,636  |

|                     |                                                                                                                                                                                                                                                                                                                                         |     |
|---------------------|-----------------------------------------------------------------------------------------------------------------------------------------------------------------------------------------------------------------------------------------------------------------------------------------------------------------------------------------|-----|
|                     | [초록] "윤리" "에티켓" "시민성" "비시민성" "프로페셔널리즘" "전문직업성" "전문직 윤리" "가이드라인" "지침"                                                                                                                                                                                                                                                                    |     |
|                     | (#2-1 논문명 AND #2-2 논문명) OR (#2-1 초록 AND #2-2 초록)                                                                                                                                                                                                                                                                                        | 165 |
| 3. Combine          | (#1 논문명 AND #2 논문명) OR (#1 초록 AND #2 초록)                                                                                                                                                                                                                                                                                                | 652 |
| 4. NOT              | "청소년" "초등" "중등" "중학" "고등" "십대" "10 대"<br><br>("간호" "의료" "의대" "의과대" "물리 치료" "작업 치료" "언어 치료" "치대" "치과" "영양학" "식품 영양학" "약대" "약학" "보건" "보건 의료" "의료 보건")<br><br>("온라인" "디지털" "사이버" "인터넷" "정보" "정보 통신" "통신" "소셜 미디어" "SNS")<br><br>("윤리" "에티켓" "시민성" "비시민성" "프로페셔널리즘" "전문직업성" "전문직 윤리" "가이드라인" "지침") !("청소년" "초등" "중등" "중학" "고등" "십대" "10 대") | 24  |
| 5. Publication Year | 1990 년 이전 제외                                                                                                                                                                                                                                                                                                                            | 24  |

| SCIENCE ON (via EWha Library) <a href="https://scienceon.kisti.re.kr/main/mainForm.do">https://scienceon.kisti.re.kr/main/mainForm.do</a> |                                                                                                                                                                                                                                                                                                                                                                                                                                                                                                    |         |
|-------------------------------------------------------------------------------------------------------------------------------------------|----------------------------------------------------------------------------------------------------------------------------------------------------------------------------------------------------------------------------------------------------------------------------------------------------------------------------------------------------------------------------------------------------------------------------------------------------------------------------------------------------|---------|
| Set #                                                                                                                                     | Search Strategy                                                                                                                                                                                                                                                                                                                                                                                                                                                                                    | Results |
| 1. Participants                                                                                                                           | [전체] "간호"OR"의료"OR"의대"OR"의과대"OR"물리 치료"OR"작업 치료"OR"언어 치료"OR"치대"OR"치과"OR"영양학"OR"식품 영양학"OR"약대"OR"약학"OR"보건"OR"보건 의료"OR"의료 보건"                                                                                                                                                                                                                                                                                                                                                                           | 179,634 |
| 2. Concept                                                                                                                                | 2-1.<br>[전체] "온라인"OR"디지털"OR"사이버"OR"인터넷"OR"정보"OR"정보 통신"OR"통신"OR"소셜 미디어"OR"SNS"                                                                                                                                                                                                                                                                                                                                                                                                                      | 377,477 |
|                                                                                                                                           | 2-2.<br>[전체] "윤리"OR"에티켓"OR"시민성"OR"비시민성"OR"프로페셔널리즘"OR"전문직업성"OR"전문직 윤리"OR"가이드라인"OR"지침"                                                                                                                                                                                                                                                                                                                                                                                                               | 37,946  |
|                                                                                                                                           | (#2-1 전체) AND (#2-2 전체)                                                                                                                                                                                                                                                                                                                                                                                                                                                                            | 6,145   |
| 3. Combine                                                                                                                                | (#1 전체) AND (#2 전체)                                                                                                                                                                                                                                                                                                                                                                                                                                                                                | 443     |
| 4. NOT                                                                                                                                    | "청소년"OR"초등"OR"중등"OR"중학"OR"고등"OR"십대"OR"10 대"<br><br>{("간호"OR"의료"OR"의대"OR"의과대"OR"물리 치료"OR"작업 치료"OR"언어 치료"OR"치대"OR"치과"OR"영양학"OR"식품 영양학"OR"약대"OR"약학"OR"보건"OR"보건 의료"OR"의료 보건") AND !("청소년"OR"초등"OR"중등"OR"중학"OR"고등"OR"십대"OR"10 대")} AND<br>{("온라인"OR"디지털"OR"사이버"OR"인터넷"OR"정보"OR"정보 통신"OR"통신"OR"소셜 미디어"OR"SNS") AND !("청소년"OR"초등"OR"중등"OR"중학"OR"고등"OR"십대"OR"10 대")} AND<br>{("윤리"OR"에티켓"OR"시민성"OR"비시민성"OR"프로페셔널리즘"OR"전문직업성"OR"전문직 윤리"OR"가이드라인"OR"지침") AND !("청소년"OR"초등"OR"중등"OR"중학"OR"고등"OR"십대"OR"10 대")} | 425     |
| 5. Publication Year                                                                                                                       | 1990 년 이전 제외                                                                                                                                                                                                                                                                                                                                                                                                                                                                                       | 425     |
