# Supplementary material for: The Pedagogy of Cyberethics in Health Professions Education: A Scoping Review
Source: Preprints.org preprint supplement (doi:10.20944/preprints202309.0557.v1), 2023-09-08

Figure S2. Publication trends by country and year

(a) Publication trends by country

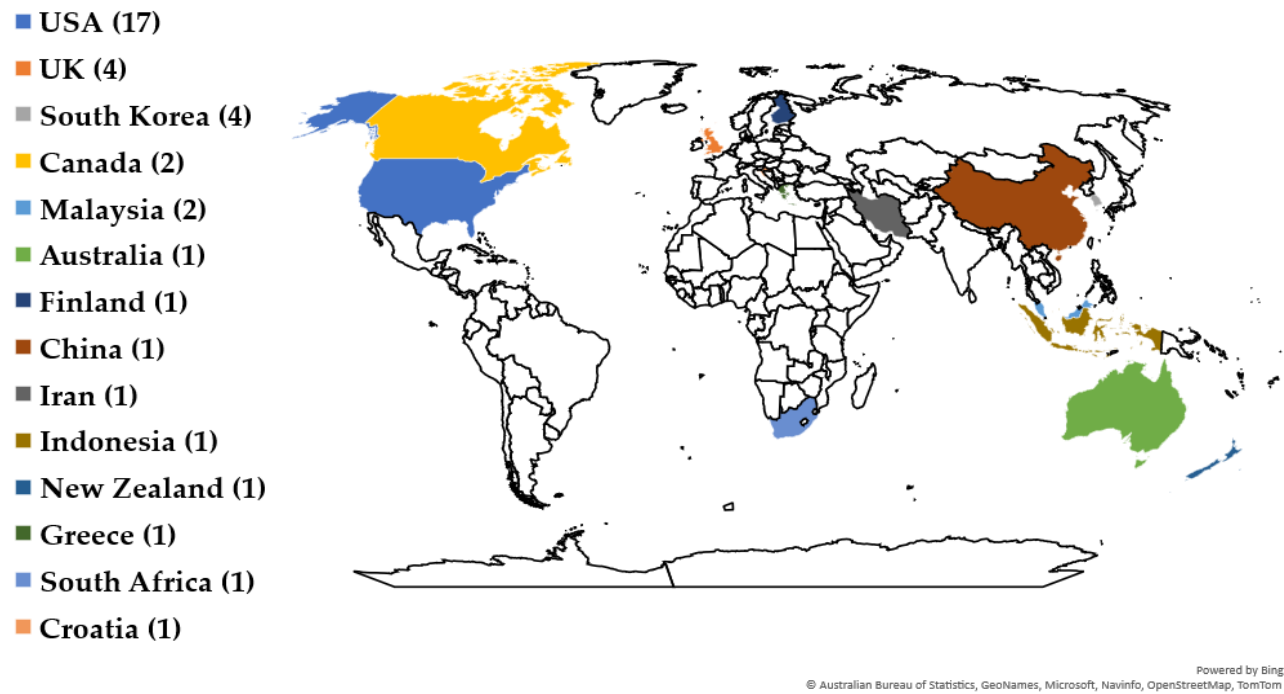

(b) Publication trends by year

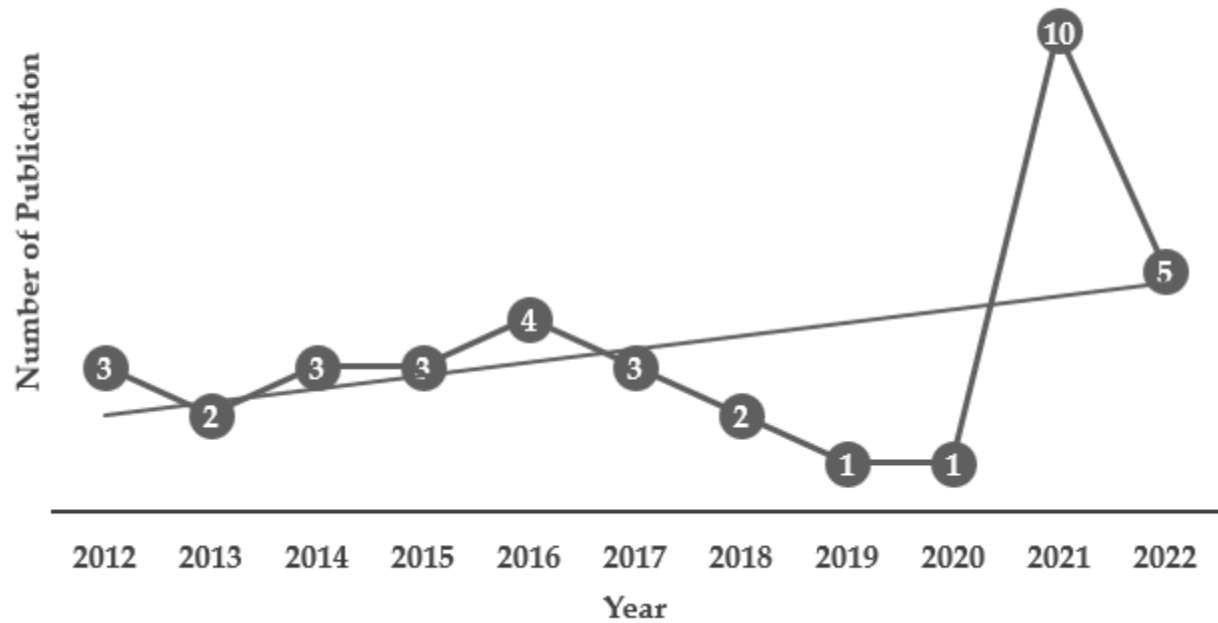

Supplement: Supplementary file 5 [file supplementary]
