# Supplementary material for: The Pedagogy of Cyberethics in Health Professions Education: A Scoping Review
Source: Preprints.org preprint supplement (doi:10.20944/preprints202309.0557.v1), 2023-09-08
Supplement: Supplementary file 7 [file supplementary]

Archive with 6 entries (6 files):
- Appendix A_Search Results.pdf
- Appendix B_Conceptualization of Cyberethics.pdf
- Appendix C_Characteristics of Cyberethics Interventions.pdf
- Figure S1_PRISMA flowchart for the article search.pdf
- Figure S2_Publication trends by country and year.pdf
- Table S2_Characteristics of included documents.pdf
